# Supplementary material for: Comparative Safety and Effectiveness of Oral Anticoagulants in Nonvalvular Atrial Fibrillation: The NAXOS Study
Source: PubMed Central journal article supplement — Stroke. 2020 Jun 16;51(7):2066–75. doi: 10.1161/STROKEAHA.120.028825 (PMC7306262; doi:10.1161/strokeaha.120.028825), 2020-06-16

Erinn Cain  
Stroke Editorial Office  
200 5th Ave, Suite 1020  
Waltham, MA 02451 USA  
stroke@strokeahajournal.org

Rueil- Malmaison, 14<sup>th</sup> May, 2020

Dear Sir,

I, Mrs. Fahmy Aida, Head of Medical Capabilities Market at Bristol Myers Squibb France, confirm that the following BMS authors:

- Mr. François Emery-Cotte,
- Mrs. Sabrina Gollety,
- Mrs. Cinira Lefevre

Contributed on behalf of BMS to the manuscript « Comparative safety and effectiveness of oral anticoagulants in non-valvular atrial fibrillation: the NAXOS study » with the Stroke journal submission ref: MS ID#:STROKE/2019/028825DR1

I confirm that the Stroke Journal has received permission from BMS to publish the manuscript.

Yours Faithfully,

Mrs. Aida Fahmy

Head of Medical Capabilities Market France

Bristol Myers Squibb



Supplement: str-51-2066-s003.pdf [file str-51-2066-s003.pdf]
